# Supplementary material for: Association of ACE gene D polymorphism with left ventricular hypertrophy in patients with diastolic heart failure: a case–control study
Source: HighWire-hosted journal article supplement (doi:10.1136/bmjopen-2015-010282), 2016-02-01
Supplement: bmjopen-2015-010282supp.pdf [file bmjopen-2015-010282supp.pdf]

Table 1. Demographic and laboratory data in each Genotype

| Variable                 | All (N=176)  | DD            | ID           | II            | P-value |
|--------------------------|--------------|---------------|--------------|---------------|---------|
| Age                      | 62.5 ± 12.6  | 63.67 ± 13.16 | 61.4 ± 12.40 | 64.32 ± 12.6  | 0.40    |
| BMI (Kg/m <sup>2</sup> ) | 26.41 ± 5.47 | 26.37 ± 5.2   | 26.8 ± 5.68  | 25.19 ± 5.19  | 0.31    |
| Sex (F/M)                | 124/52       | 40/9          | 61/32        | 23/11         | 0.12    |
| Smoking (%)              | 13.5         | 8             | 14           | 23            | 0.04    |
| DM (%)                   | 35           | 38            | 33           | 35            | 0.89    |
| SBP (mmHg)               | 143.2 ± 27.2 | 141.1 ± 23.3  | 145.6 ± 29.0 | 139.8 ± 27.4  | 0.45    |
| DBP (mmHg)               | 84.5 ± 11.4  | 83.9 ± 9.8    | 85.0 ± 11.0  | 83.9 ± 14.8   | 0.82    |
| HB (g/dL)                | 13.0 ± 1.6   | 12.9 ± 1.6    | 13.0 ± 1.6   | 13.0 ± 1.7    | 0.92    |
| Cr (mg/dL)               | 1.12 ± 0.33  | 1.1 ± 0.25    | 1.17 ± 0.37  | 1.05 ± 0.30   | 0.17    |
| FBS (mg/dL)              | 136.4 ± 66.4 | 125.4 ± 31.3  | 145.9 ± 82.8 | 126.19 ± 18.4 | 0.13    |
| TG (mg/dL)               | 163.7 ± 85.2 | 148.6 ± 54.7  | 172.9 ± 94.9 | 160.3 ± 91.8  | 0.26    |
| LDL (mg/dL)              | 114.9 ± 32.8 | 114.7 ± 36.6  | 117.6 ± 29.4 | 108.0 ± 35.5  | 0.34    |
| HDL (mg/dL)              | 39.9 ± 8.8   | 40.0 ± 9.6    | 39.9 ± 8.5   | 39.97 ± 8.81  | 0.99    |

BMI: body mass index, DM: diabetes mellitus, SBP: systolic blood pressure, DBP: diastolic blood pressure, HB: hemoglobin, Cr: creatinine, FBS: fasting blood sugar, TG: triglyceride, LDL: low density lipoprotein, HDL: high density lipoprotein
